# Supplementary material for: The Genetic Architecture of Post-Zygotic Reproductive Isolation Between Anopheles coluzzii and An. quadriannulatus
Source: Front Genet. 2020 Aug 14;11:925. doi: 10.3389/fgene.2020.00925 (PMC7480394; doi:10.3389/fgene.2020.00925)
Supplement: Supplementary file 1 [file Data_Sheet_1.xlsx]

## Sheet: Deitz_et_al_2020_String_int
#node1	node2	node1_string_internal_id	node2_string_internal_id	node1_external_id	node2_external_id	neighborhood_on_chromosome	gene_fusion	phylogenetic_cooccurrence	homology	coexpression	experimentally_determined_interaction	database_annotated	automated_textmining	combined_score
1270580	AGAP004709-PA	3127385	3121173	7165.AGAP011345-PA	7165.AGAP004709-PA	0	0	0	0	0.456	0.692	0	0	0.825
1270580	1278408	3127385	3121280	7165.AGAP011345-PA	7165.AGAP004818-PA	0	0	0	0	0.148	0.687	0	0	0.721
1270588	1281963	3127392	3118057	7165.AGAP011352-PA	7165.AGAP001205-PA	0.233	0	0	0	0.124	0.079	0	0.544	0.68
1270608	1278481	3127370	3121208	7165.AGAP011329-PA	7165.AGAP004744-PA	0.053	0	0	0	0.09	0	0.8	0.119	0.827
1275137	1281951	3121287	3118067	7165.AGAP004827-PA	7165.AGAP001217-PA	0	0	0	0	0	0	0.9	0	0.9
1278314	1278457	3127423	3121232	7165.AGAP011387-PA	7165.AGAP004768-PA	0	0	0	0	0.589	0	0	0	0.589
1278324	1278426	3127414	3121260	7165.AGAP011374-PA	7165.AGAP004798-PA	0	0	0	0	0.091	0	0	0.395	0.426
1278324	1278457	3127414	3121232	7165.AGAP011374-PA	7165.AGAP004768-PA	0	0	0	0	0	0	0	0.401	0.4
1278334	5668064	3127401	3126859	7165.AGAP011361-PA	7165.AGAP010787-PA	0	0	0	0	0	0	0	0.612	0.612
1278400	1278457	3121282	3121232	7165.AGAP004820-PA	7165.AGAP004768-PA	0	0	0	0	0.691	0	0	0	0.691
1278400	1278486	3121282	3121203	7165.AGAP004820-PA	7165.AGAP004739-PA	0	0	0	0	0.219	0	0	0.337	0.46
1278408	AGAP004709-PA	3121280	3121173	7165.AGAP004818-PA	7165.AGAP004709-PA	0	0	0	0	0.181	0.719	0	0	0.76
1278408	AGAP004703-PA	3121280	3121168	7165.AGAP004818-PA	7165.AGAP004703-PA	0	0	0	0	0.132	0.399	0	0.258	0.579
1278408	1281947	3121280	3118072	7165.AGAP004818-PA	7165.AGAP001223-PA	0.053	0	0	0	0.093	0.047	0	0.401	0.444
1278413	1278497	3121274	3121195	7165.AGAP004812-PA	7165.AGAP004731-PA	0	0	0	0	0	0	0.8	0	0.8
1278422	1281945	3121263	3118074	7165.AGAP004801-PA	7165.AGAP001225-PA	0	0	0	0	0.09	0.317	0	0.483	0.65
1278422	eIF3-S8	3121263	3121189	7165.AGAP004801-PA	7165.AGAP004725-PA	0	0	0	0	0.089	0	0	0.379	0.41
1278429	3289846	3121258	3121219	7165.AGAP004795-PA	7165.AGAP004755-PA	0	0	0	0	0	0	0	0.681	0.681
1278437	1278483	3121249	3121206	7165.AGAP004786-PA	7165.AGAP004742-PA	0	0	0	0	0.11	0	0.9	0.352	0.937
1278437	5667370	3121249	3121237	7165.AGAP004786-PA	7165.AGAP004773-PA	0	0	0.449	0.986	0	0	0.8	0	0.801
1278437	1278481	3121249	3121208	7165.AGAP004786-PA	7165.AGAP004744-PA	0	0	0	0	0.241	0	0	0.385	0.513
1278442	1281950	3121245	3118069	7165.AGAP004782-PA	7165.AGAP001219-PA	0	0	0	0	0	0.278	0	0.255	0.439
1278447	1281497	3121243	3118488	7165.AGAP004780-PA	7165.AGAP001677-PC	0	0	0	0	0.047	0.341	0	0.352	0.557
1278447	AGAP004703-PA	3121243	3121168	7165.AGAP004780-PA	7165.AGAP004703-PA	0	0	0	0	0.049	0.336	0	0.188	0.442
1278449	4576614	3121242	3121186	7165.AGAP004778-PA	7165.AGAP004722-PA	0	0	0	0	0.056	0	0	0.702	0.706
1278452	1278526	3121238	3121169	7165.AGAP004774-PA	7165.AGAP004704-PA	0	0	0	0	0.09	0.276	0	0.668	0.762
1278457	1278486	3121232	3121203	7165.AGAP004768-PA	7165.AGAP004739-PA	0	0	0	0	0.83	0.339	0	0	0.882
1278457	1281947	3121232	3118072	7165.AGAP004768-PA	7165.AGAP001223-PA	0	0	0	0	0.7	0.141	0	0.097	0.746
1278457	eIF3-S8	3121232	3121189	7165.AGAP004768-PA	7165.AGAP004725-PA	0	0	0	0	0.694	0	0	0	0.694
1278457	TRMB_ANOGA	3121232	3121216	7165.AGAP004768-PA	7165.AGAP004752-PA	0	0	0	0	0.599	0	0	0	0.599
1278459	1281485	3121230	3118500	7165.AGAP004766-PC	7165.AGAP001690-PB	0	0	0	0	0.049	0	0	0.67	0.672
1278480	AGAP004686-PA	3121209	3121152	7165.AGAP004745-PA	7165.AGAP004686-PA	0	0	0	0	0.219	0.09	0	0.352	0.499
1278482	1281947	3121207	3118072	7165.AGAP004743-PA	7165.AGAP001223-PA	0	0.108	0	0	0.053	0	0	0.681	0.707
1278482	AGAP004691-PA	3121207	3121157	7165.AGAP004743-PA	7165.AGAP004691-PA	0	0.64	0	0	0	0	0	0	0.64
1278483	AGAP004699-PA	3121206	3121164	7165.AGAP004742-PA	7165.AGAP004699-PA	0	0	0	0	0	0	0	0.452	0.452
1278486	1281947	3121203	3118072	7165.AGAP004739-PA	7165.AGAP001223-PA	0.057	0	0	0	0.8	0.152	0	0.655	0.937
1278486	Cbp80	3121203	3118048	7165.AGAP004739-PA	7165.AGAP001195-PA	0	0	0	0	0.125	0.568	0	0.115	0.636
1278486	eIF3-S8	3121203	3121189	7165.AGAP004739-PA	7165.AGAP004725-PA	0	0	0	0	0.371	0.274	0	0	0.523
1278505	1281976	3121187	3118047	7165.AGAP004723-PA	7165.AGAP001194-PA	0	0	0	0	0.052	0.249	0	0.453	0.576
1278855	1278486	3126879	3121203	7165.AGAP010807-PA	7165.AGAP004739-PA	0	0	0	0	0.133	0.162	0	0.798	0.84
1278855	TRMB_ANOGA	3126879	3121216	7165.AGAP010807-PA	7165.AGAP004752-PA	0.217	0	0	0	0.173	0.066	0	0.26	0.492
1278858	1278508	3126878	3121184	7165.AGAP010806-PA	7165.AGAP004720-PA	0	0.045	0	0	0	0	0	0.478	0.48
1278869	D1.7	3126865	3118493	7165.AGAP010793-PA	7165.AGAP001682-PA	0	0	0	0	0	0	0	0.555	0.555
1278870	5667168	3126864	3121174	7165.AGAP010792-PA	7165.AGAP004710-PA	0	0	0	0	0.694	0.844	0	0.077	0.952
1278871	1281951	3126863	3118067	7165.AGAP010791-PA	7165.AGAP001217-PA	0	0	0	0	0	0	0.9	0.286	0.925
1278871	AGAP004703-PA	3126863	3121168	7165.AGAP010791-PA	7165.AGAP004703-PA	0.054	0	0	0	0.132	0	0.65	0.378	0.797
1278871	4577275	3126863	3118496	7165.AGAP010791-PA	7165.AGAP001685-PA	0	0	0	0	0.05	0.576	0	0	0.579
1278871	1281947	3126863	3118072	7165.AGAP010791-PA	7165.AGAP001223-PA	0.055	0	0	0	0.055	0.222	0	0.352	0.489
1278871	5667395	3126863	3121241	7165.AGAP010791-PA	7165.AGAP004777-PA	0	0	0	0	0.049	0.115	0	0.379	0.431
1278872	1281950	3126862	3118069	7165.AGAP010790-PA	7165.AGAP001219-PA	0	0	0	0	0.048	0.131	0.6	0.095	0.66
1278872	1281942	3126862	3118078	7165.AGAP010790-PA	7165.AGAP001229-PA	0	0	0	0	0.042	0.336	0	0.471	0.634
1278872	1278504	3126862	3121188	7165.AGAP010790-PA	7165.AGAP004724-PA	0	0	0	0	0.122	0	0	0.352	0.406
1278878	CASPL2	3126858	3121218	7165.AGAP010786-PA	7165.AGAP004754-PA	0	0	0	0	0	0	0	0.451	0.451
1278884	1281493	3126849	3118495	7165.AGAP010777-PA	7165.AGAP001684-PA	0	0	0	0	0	0	0	0.839	0.839
1281483	1281958	3118501	3118062	7165.AGAP001694-PA	7165.AGAP001211-PA	0	0	0	0	0	0.13	0	0.892	0.902
1281483	1281485	3118501	3118500	7165.AGAP001694-PA	7165.AGAP001690-PB	0	0	0	0	0	0	0	0.681	0.681
1281485	4577273	3118500	3118494	7165.AGAP001690-PB	7165.AGAP001683-PA	0	0	0	0	0.049	0.059	0	0.661	0.67
1281946	Cbp80	3118073	3118048	7165.AGAP001224-PA	7165.AGAP001195-PA	0	0	0	0	0.292	0	0	0.394	0.552
3289846	1278543	3121219	3121161	7165.AGAP004755-PA	7165.AGAP004695-PA	0	0	0	0	0	0	0	0.602	0.602
3289852	1281493	3121270	3118495	7165.AGAP004808-PA	7165.AGAP001684-PA	0	0	0	0	0.05	0	0	0.437	0.443
3291165	1278455	3126854	3121233	7165.AGAP010782-PA	7165.AGAP004769-PA	0	0	0	0	0	0.328	0	0.681	0.776
3291165	AGAP004699-PA	3126854	3121164	7165.AGAP010782-PA	7165.AGAP004699-PA	0	0	0	0	0	0.097	0	0.681	0.699
4576567	1278487	3121204	3121202	7165.AGAP004740-PA	7165.AGAP004738-PA	0	0.565	0	0	0	0	0	0	0.565
4576614	5667168	3121186	3121174	7165.AGAP004722-PA	7165.AGAP004710-PA	0	0	0	0	0.048	0	0	0.681	0.683
4577273	1281976	3118494	3118047	7165.AGAP001683-PA	7165.AGAP001194-PA	0	0	0	0	0.052	0.336	0	0.137	0.409
5666840	AGAP004699-PA	3121283	3121164	7165.AGAP004823-PA	7165.AGAP004699-PA	0	0	0	0	0	0.318	0	0.351	0.538
5667168	1281946	3121174	3118073	7165.AGAP004710-PA	7165.AGAP001224-PA	0	0	0	0	0.582	0	0	0	0.582
5667370	1278483	3121237	3121206	7165.AGAP004773-PA	7165.AGAP004742-PA	0	0	0	0	0.11	0	0.9	0.352	0.937
5667370	1278481	3121237	3121208	7165.AGAP004773-PA	7165.AGAP004744-PA	0	0	0	0	0.241	0	0	0.385	0.513
5667395	1278448	3121241	3121239	7165.AGAP004777-PA	7165.AGAP004775-PA	0	0.424	0	0	0	0	0	0	0.424
5668062	1281490	3127396	3118497	7165.AGAP011356-PA	7165.AGAP001686-PA	0	0	0	0	0	0	0	0.832	0.832
5668062	1278447	3127396	3121243	7165.AGAP011356-PA	7165.AGAP004780-PA	0	0	0	0	0.044	0.14	0	0.396	0.46
11175582	1278855	3129005	3126879	7165.AGAP013048-PA	7165.AGAP010807-PA	0	0	0	0	0.048	0.089	0	0.681	0.699
11176012	1278487	3129102	3121202	7165.AGAP013145-PB	7165.AGAP004738-PA	0	0	0	0	0	0	0	0.681	0.681
AGAP004686-PA	Cbp80	3121152	3118048	7165.AGAP004686-PA	7165.AGAP001195-PA	0	0	0	0	0.133	0.322	0	0.165	0.466
AGAP004703-PA	1281943	3121168	3118077	7165.AGAP004703-PA	7165.AGAP001228-PA	0	0	0	0	0.051	0.54	0	0.681	0.848
AGAP004703-PA	1281947	3121168	3118072	7165.AGAP004703-PA	7165.AGAP001223-PA	0	0	0	0	0.687	0.141	0	0.057	0.724
AGAP004707-PA	AGAP004699-PA	3121171	3121164	7165.AGAP004707-PA	7165.AGAP004699-PA	0	0	0	0	0.049	0.083	0	0.56	0.582
AGAP004824-PA	eIF3-S8	3121284	3121189	7165.AGAP004824-PA	7165.AGAP004725-PA	0	0	0	0	0.679	0.577	0	0.681	0.952
AGAP004824-PA	1278486	3121284	3121203	7165.AGAP004824-PA	7165.AGAP004739-PA	0.187	0	0.255	0	0.217	0.581	0	0.201	0.812
AGAP004824-PA	1278408	3121284	3121280	7165.AGAP004824-PA	7165.AGAP004818-PA	0.144	0	0	0	0.172	0.606	0	0.324	0.785
AGAP004824-PA	1281947	3121284	3118072	7165.AGAP004824-PA	7165.AGAP001223-PA	0.044	0	0	0	0.067	0.155	0	0.352	0.446
CLIPC9	AGAP004699-PA	3121183	3121164	7165.AGAP004719-PA	7165.AGAP004699-PA	0	0	0	0	0	0.047	0	0.49	0.493
CLIPC9	AGAP001190-PA	3121183	3118044	7165.AGAP004719-PA	7165.AGAP001190-PA	0	0	0.446	0	0	0	0	0.045	0.448
EXD_ANOGA	CPF3	3121162	3121156	7165.AGAP004696-PA	7165.AGAP004690-PA	0	0	0	0	0	0	0	0.505	0.505
IAP2	CASPL2	3127367	3121218	7165.AGAP011326-PA	7165.AGAP004754-PA	0	0	0	0	0	0.272	0	0.706	0.776
OBP56	OBP10	3127407	3118043	7165.AGAP011367-PA	7165.AGAP001189-PA	0	0	0	0	0	0	0	0.453	0.453
pofut1	1278880	3127378	3126856	7165.AGAP011338-PA	7165.AGAP010784-PA	0	0	0	0	0.044	0	0	0.49	0.491
TRMB_ANOGA	eIF3-S8	3121216	3121189	7165.AGAP004752-PA	7165.AGAP004725-PA	0	0	0	0	0.057	0	0	0.646	0.651
TRMB_ANOGA	1278486	3121216	3121203	7165.AGAP004752-PA	7165.AGAP004739-PA	0.257	0	0	0	0.221	0	0	0.324	0.574
